# Supplementary material for: Gas separation membranes made through thermal rearrangement of ortho-methoxypolyimides
Source: Royal Society of Chemistry journal article supplement (doi:10.1039/c5ra19207b), 2015-01-01
Supplement: c5ra19207b1.pdf [file c5ra19207b1.pdf]

## Supporting Information

### Gas Separation Membranes Made through Thermal Rearrangement of *ortho*-methoxypolyimides

Bibiana Comesaña-Gándara <sup>a,b,c,d</sup>, José G. de la Campa <sup>a,\*</sup>, Antonio Hernández <sup>b</sup>, Hye Jin Jo <sup>d</sup>, Young Moo Lee <sup>d,\*</sup>, Javier de Abajo <sup>a</sup>, Angel E. Lozano <sup>a,b,d,\*</sup>

<sup>a</sup> Institute of Polymer Science and Technology, ICTP-CSIC, Madrid, Spain

<sup>b</sup> SMAP UA-UVA\_CSIC, University of Valladolid, Valladolid, Spain

<sup>c</sup> IU Cinquima, University of Valladolid, Valladolid, Spain

<sup>d</sup> Department of Energy Engineering, College of Engineering, Hanyang University, Seoul 133-791, Republic of Korea

\*(A. E. L) Telephone: +34-91-561-88-06 Ext. 320; E-mail. lozano@ictp.csic.es

\*(J. G. C) Telephone: +34-91-562-29-00 Ext. 350; E-mail. jcampa@ictp.csic.es

\*(Y. M. L) Telephone: +82-2-2220-0525; E-mail. ymlee@hanyang.ac.kr

#### Abbreviations

|                   |                                                                                            |
|-------------------|--------------------------------------------------------------------------------------------|
| <b>PI-OH</b>      | Polyimide membrane with <i>ortho</i> -positioned OH group                                  |
| <b>TR-OH350</b>   | Polyimide membrane with <i>ortho</i> -positioned OH group heated at 350 °C for 1h          |
| <b>TR-OH400</b>   | Polyimide membrane with <i>ortho</i> -positioned OH group heated at 400 °C for 1h          |
| <b>TR-OH450</b>   | Polyimide membrane with <i>ortho</i> -positioned OH group heated at 450 °C for 30 minutes  |
| <b>PI-OAc</b>     | Polyimide membrane with <i>ortho</i> -positioned OAc group                                 |
| <b>TR- OAc350</b> | Polyimide membrane with <i>ortho</i> -positioned OAc group heated at 350 °C for 1h         |
| <b>TR- OAc400</b> | Polyimide membrane with <i>ortho</i> -positioned OAc group heated at 400 °C for 1h         |
| <b>TR- OAc450</b> | Polyimide membrane with <i>ortho</i> -positioned OAc group heated at 450 °C for 30 minutes |
| <b>PI-OMe</b>     | Polyimide membrane with <i>ortho</i> -positioned OMe group                                 |
| <b>TR- OMe350</b> | Polyimide membrane with <i>ortho</i> -positioned OMe group heated at 350 °C for 1h         |
| <b>TR- OMe400</b> | Polyimide membrane with <i>ortho</i> -positioned OMe group heated at 400 °C for 1h         |
| <b>TR- OMe450</b> | Polyimide membrane with <i>ortho</i> -positioned OMe group heated at 450 °C for 30 minutes |

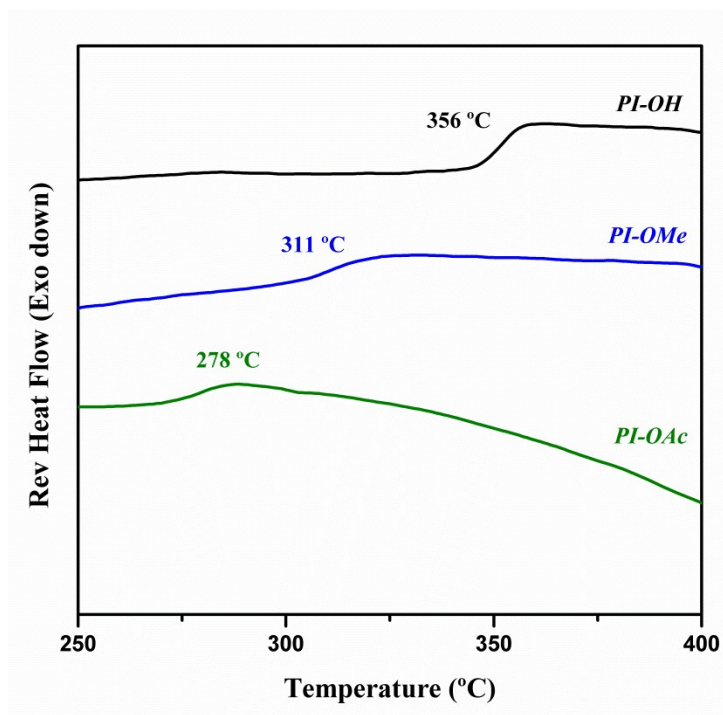

**Fig. S1.** Glass transition temperatures of precursor polyimides determined by MDSC.

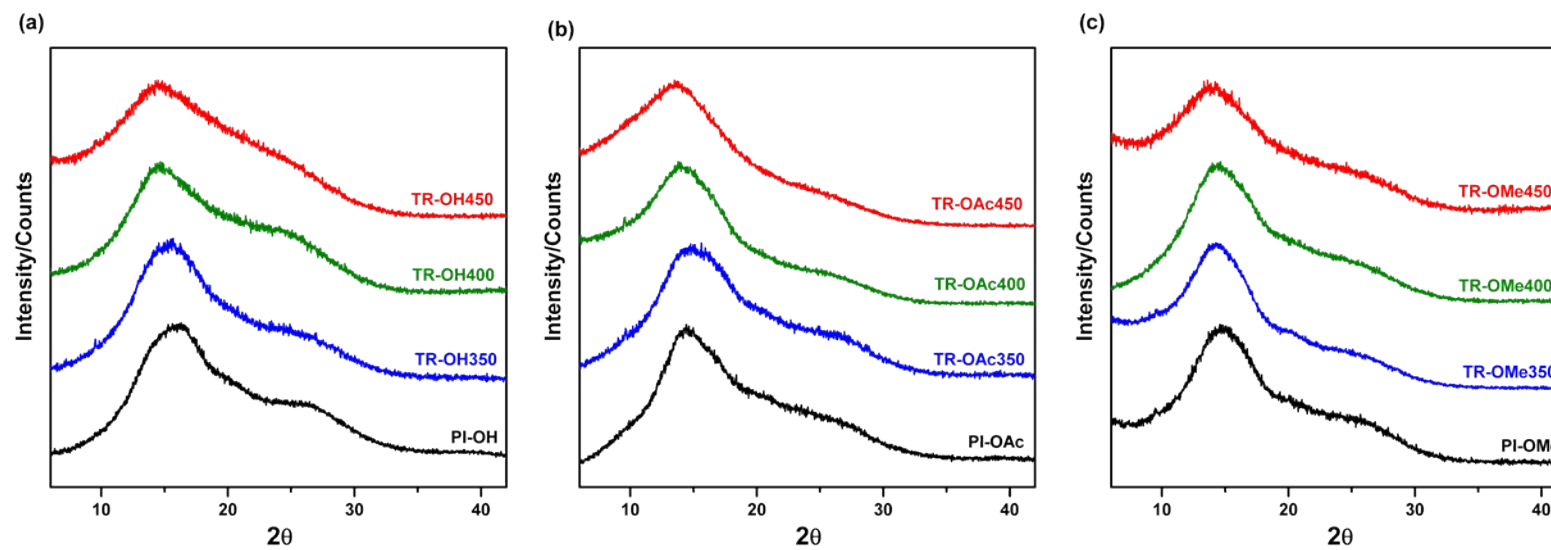

**Fig. S2.** Wide angle X-ray diffraction (WAXD) patterns of (a) PI-OH, (b) PI-OAc and (c) PI-OMe precursor polyimides along with the TR derived membranes, treated at different temperatures and heating times.

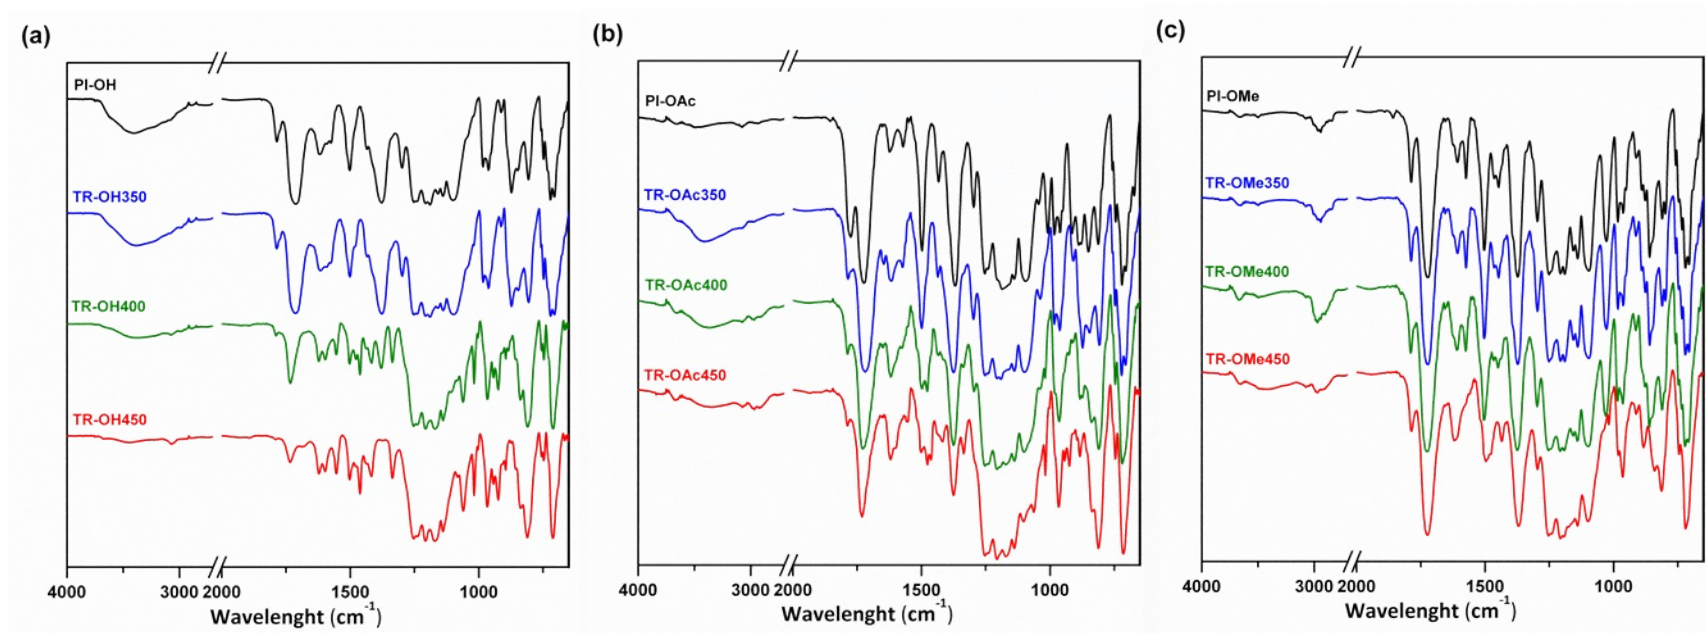

**Fig. S3.** ATR-FTIR spectra of (a) *PI-OH*, (b) *PI-OAc* and (c) *PI-OMe* precursor polyimides and thermally rearranged analog membranes, treated at different temperatures and heating times.
